## **The Role of Temperature on the Development of Circadian Rhythms in Honey Bee Workers**

### **Authors:**

Manuel A. Giannoni-Guzmán<sup>1</sup>, Janpierre Aleman-Rios<sup>2</sup>, Alexander M. Melendez Moreno<sup>2</sup>,  
Gabriel Diaz Hernandez<sup>2</sup>, Melina Perez<sup>2</sup>, Darimar Loubriel<sup>2</sup>, Tugrul Giray<sup>2</sup> and Jose L.  
Agosto-Rivera<sup>2</sup>

### **Affiliations:**

1. Department of Biological Sciences, Vanderbilt University, Nashville, TN, USA
2. Department of Biology, University of Puerto Rico Rio Piedras Campus, San Juan, PR

**Corresponding author:** Manuel A. Giannoni-Guzmán

**e-mail:** manuel.giannoni10@gmail.com

**Key words:** Honey bee, development, circadian, workers, temperature

1 **Abstract:**

2           Circadian rhythms in honey bees are involved in various processes that impact colony  
3 survival. For example, young nurses take care of the brood constantly throughout the day and  
4 lack circadian rhythms, while foragers use the circadian clock to remember and predict food  
5 availability in subsequent days. Previous studies suggested that development of circadian  
6 rhythms both in the field and the laboratory began around 7-9 days of age. However, not much  
7 is understood about the postembryonic development of circadian rhythms in honey bees. In  
8 the current study, we examine the effects of socially regulated colony temperature on the  
9 ontogeny of circadian rhythms of young workers under controlled laboratory conditions. We  
10 hypothesized that temperature plays a key role in the development of circadian rhythmicity in  
11 young workers. Our results show that young workers kept at 35°C develop circadian  
12 rhythmicity faster and in greater proportion than bees kept at 25°C. In addition, we examine if  
13 the effect of colony temperature during the first 48 hours after emergence is enough to  
14 observe effects on the rate and proportion of development of circadian rhythmicity. We  
15 observed that twice as many individuals that were exposed to 35°C during the first 48 hours  
16 develop circadian rhythms compared to individuals kept at 25°C. In addition, we observed  
17 differences in the average endogenous period length consistent with temperature  
18 compensation of the circadian rhythms between the 25°C and 35°C cohorts. We also observed  
19 differences in the degree of period length variation between the 25°C and 35°C cohorts, which  
20 combined with the proportion of arrhythmic individuals and survival data suggest that  
21 development of circadian rhythms is incomplete in individuals exposed to 25°C adult  
22 emergence. This study shows that temperature, which is socially regulated inside the hive, is  
23 a key factor that influences the ontogeny of circadian rhythmicity of workers.

24

25

26 **Introduction:**

27           The circadian clock of honey bees is important in complex physiological processes,  
28 such as spatiotemporal learning, time perception and sun-compass navigation (Goodwin and  
29 Lewis, 1987; Moore et al., 1998; Van Nest and Moore, 2012; von Frisch, 1967; Wagner et al.,  
30 2013). However, when it comes to development of circadian rhythms in honey bee workers,  
31 scientists are just beginning to scratch the surface of what is thought to be a highly complex  
32 mechanism of regulation, with components at the environmental, social, hormonal and genetic  
33 levels (Eban-Rothschild et al., 2012; Moore, 2001; Moore et al., 1998; Shemesh et al., 2007).  
34 In this manuscript, we study the role of environmental temperature on the ontogeny of  
35 circadian rhythms of young honey bee workers.

36           The development of honey bee circadian rhythms is of particular interest because  
37 similar to human infants, young honey bees present postembryonic development of circadian  
38 rhythms before they forage (Eban-Rothschild et al., 2012; Moore et al., 1998). Furthermore,  
39 in the colony, it is thought that workers will remain arrhythmic performing in-hive tasks and will  
40 develop circadian rhythmicity just prior to the onset of foraging behavior, suggesting that  
41 ontogeny of circadian rhythms is intertwined with age-related division of labor in the colony.  
42 Studies examining the timing of in-hive tasks such as brood care found that individual 'nurses'  
43 performed this task around the clock, which is thought to benefit the developing brood (Moore  
44 et al., 1998).

45           In isolation, during the first days of their adult life young bees lack behavioral,  
46 metabolic or daily oscillations in circadian gene expression in the brain, that are associated  
47 with circadian rhythmicity. Under these constant conditions (DD, ~60%RH, 26-30°C),  
48 researchers have reported that ontogeny of circadian rhythmicity occurs at around 7-10 days  
49 of age in 50% of the sampled subjects (Moore, 2001; Toma et al., 2000). Furthermore, under  
50 these experimental conditions by 16 days of age around 25% of the bees were still arrhythmic.

51 Since ontogeny of circadian rhythms is thought to be regulated by age-related division of labor,  
52 researchers have manipulated neuroendocrine signals known to accelerate onset of foraging  
53 (such as juvenile hormone, octopamine and cGMP dependent protein kinase), hypothesizing  
54 a similar effect on circadian rhythms without success in individually isolated bees (Ben-  
55 Shahr, 2003; Bloch et al., 2002; Meshi and Bloch, 2007). A recent study examined whether  
56 the colony environment or other social cues may elicit strong circadian rhythms in young  
57 workers (Eban-Rothschild et al., 2012). Their findings reveal that experiencing the colony  
58 environment, either in a mesh cage or interacting with other bees for 48 hours after adult  
59 emergence, resulted in strong circadian rhythms when bees were brought to the laboratory.  
60 The authors of this work postulate that social cues, the colony microenvironment or a  
61 combination of both plays a role in the ontogeny of circadian rhythms of young workers. Taken  
62 together, these studies suggest the existence of a cue, which can be social or environmental,  
63 that elicits the development of circadian rhythmicity.

64 Honey bee colonies are able to efficiently regulate the colony microenvironment  
65 (Jones et al., 2004, 2007; Kronenberg and Heller, 1982; Seeley, 1974; Simpson, 1961).  
66 Studies have shown that bees regulate CO<sub>2</sub> levels, humidity and temperature inside the  
67 colony (Ohashi et al., 2008). In response to an increase in CO<sub>2</sub> levels inside the colony honey  
68 bee workers begin fanning until CO<sub>2</sub> levels diminish (Seeley, 1974). While the ability of honey  
69 bees to control temperature has been the main interest of researchers, humidity inside the  
70 nest is also regulated by workers (Human et al., 2006). Studies have shown that colonies with  
71 a naturally mated queen, are able to regulate temperature better than colonies that originate  
72 from a single drone artificially inseminated queen (Jones et al., 2004). This temperature  
73 control is especially important, since deviations of more than 1.5°C from 35°C at the core of  
74 the hive during larval and pupal development can have lasting changes in the adult honey bee  
75 (Winston, 1987).

76 Environmental temperature is also important for locomotor activity rhythms. Studies  
77 examining the endogenous rhythms of the Japanese honey bee *Apis cerana* show that  
78 environmental temperature has a direct effect on the endogenous period length of foragers  
79 (Fuchikawa and Shimizu, 2007). Recent work in our laboratory using the gentle Africanized  
80 honey bee (*gAHB*) also shows that environmental temperature affects the endogenous period  
81 length in honey bee foragers (Giannoni-Guzmán et al., 2014). However, the effect of  
82 temperature in the development of circadian rhythms in honey bee workers has yet to be  
83 explored.

84 In the current study we examined the effects of environmental temperature on the  
85 development of circadian rhythms in young workers. We hypothesized that temperature at the  
86 center of the colony is important for the development of circadian rhythms in young honey bee  
87 workers. In order to test this hypothesis, we isolated 1-day-old workers in locomotor activity  
88 monitors either at 25°C or 35°C. We examined the endogenous period length of rhythmic  
89 individuals in each group, the variation in period length and the mortality between the groups.  
90 Lastly, given the previous body of work that indicates that the first 48 hours after emergence  
91 are important for the development of circadian rhythms, we examined the effect of colony  
92 temperature during these 48 hours by placing individuals at 35°C and then changing the  
93 temperature to 25°C. Our results highlight the importance of socially regulated temperature of  
94 the hive in the ontogeny of circadian rhythms in honey bee workers.

95

96

97

98

99

100 **Materials and Methods:**

101 **Honey bees Colonies and collections:**

102 Colonies used in our experiments had mated queens that were laying eggs of gentle  
103 Africanized honey bees (Gallindo-Cardona et al., 2013). These colonies were located at the  
104 University of Puerto Rico (UPR) Gurabo Experimental Station in Gurabo, Puerto Rico. For all  
105 experiments, brood frames were collected, workers were removed and then the frame was  
106 stored in an incubator overnight (~35°C). The following morning, bees that emerged from the  
107 frames were collected and placed inside individual tubes for locomotor activity monitoring.  
108 The first colony of experiment 1 was examined on November 29, 2012 (colony 1), while the  
109 second colony was assayed beginning January 12, 2013 (colony 2). A total of 320 bees were  
110 used in this experiment, 256 for colony 1 and 64 for colony 2. Experiment 2 examined the  
111 effect of temperature during the first 48 hours after eclosion on the development of circadian  
112 rhythms, fixed began on February 26, 2016.

113 **Experiment 1: Development of Circadian rhythms at 25°C vs. 35°C**

114 Locomotor activity measurements were carried out using two environmental chambers  
115 (Percival, I-30BLL) set up under constant darkness, relative humidity of 80%±5% and  
116 temperature of 25±0.5°C or 35±0.5°C and maintained constant throughout the experiments.  
117 Locomotor activity was recorded using monitors and software from Trikinetics (Waltham, MA,  
118 USA) as previously described (Giannoni-Guzmán et al., 2014). Briefly, 1-day-old workers  
119 were collected from the brood frame and placed inside individual tubes within the activity  
120 monitoring system. Food in the form of honey candy (mixed sugar and honey) and water were  
121 provided “*ad-libitum*” and changed as needed. Circadian rhythmicity was determined using 4  
122 consecutive days of data (days 6-10), using autocorrelation analysis for 1-minute bins (Levine  
123 et al., 2002). All bees were approximately the same age for periods where rhythmicity was  
124 analyzed.

125

126 **Experiment 2: Development of circadian rhythms after 48 hours at 35°C**

127 As in experiment 1, we carried out locomotor activity measurements using two  
128 environmental chambers. In one of these the temperature during the first 48 hours was set at  
129 35°C and afterwards lowered to 25°C for the remainder of the experiment. The other incubator  
130 was kept at 25°C throughout the experiment. Food and water were provided *ad libitum* and  
131 changed as needed.

132 **Data analysis:**

133 All data sets were tested for normality via a Goodness of Fit test and appropriate  
134 nonparametric statistics were used where needed. The locomotor activity of each individual  
135 was processed using freely available MatLab® toolboxes developed in Jeffrey Hall's  
136 laboratory (Levine et al., 2002). Visual examination of locomotor activity for each individual in  
137 the form of actograms was utilized to determine the age at onset of circadian rhythms.  
138 Repeated measures MANOVA were utilized to determine if there were significant differences  
139 between the onset of rhythmicity between each of the experimental groups. Autocorrelation  
140 plots were utilized to confirm rhythmicity and calculate period length for each bee. Period  
141 length analysis was calculated for days. To examine differences in average period length  
142 between cohorts a two-way ANOVA was performed. To determine differences in the degree  
143 of period length variation the Levine's test for equality of variance was performed.

144 To determine if environment temperature influences survival in our experiments, we  
145 performed survival analysis via the Gehan-Breslow-Wilcoxon test. Furthermore, Proportional  
146 Hazards analysis was performed to determine if differences in mortality were the result of  
147 independent factors or a combination of different factors. All statistical analyses were  
148 performed using the JMP™ software package from SAS (SAS Institute Inc., 2009); graphs

149 and figures were created in MATLAB (MathWorks, Inc., Natick, MA, USA) and GraphPad  
150 Prism 6.00 (GraphPad Software, La Jolla, CA, USA).

151 **Results:**

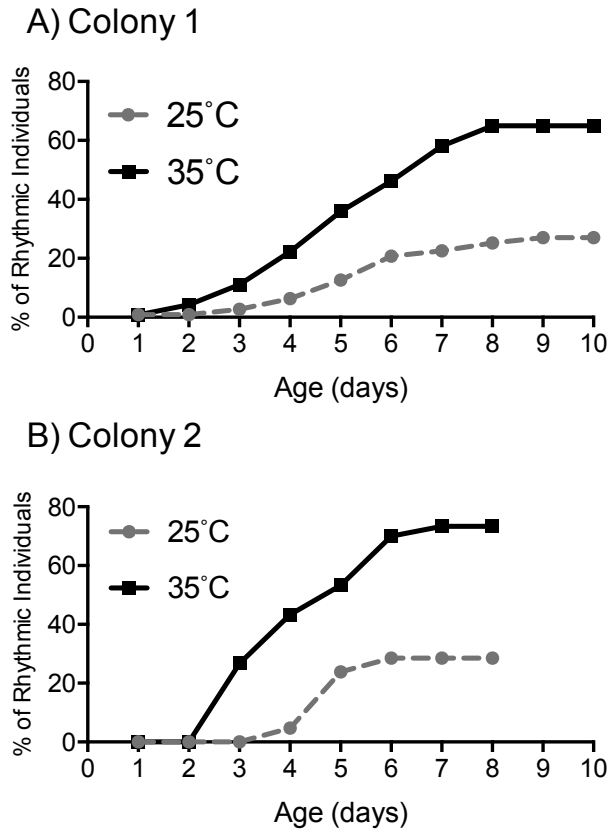

**Figure 1. Rate and proportion of young workers developing circadian rhythms is greater at 35°C than at 25°C.** Cumulative distribution of rhythmic young workers at 25°C and 35°C in constant darkness for two colonies. At 35°C the rate of development and the proportion of 1-day-old bees developing strong circadian rhythms were higher than at 25°C. Repeated measures MANOVA for each of the colonies samples yielded significant differences between the 25°C and 35°C conditions for both colonies sampled **A)** Colony 1 ( $F=3.94$ ,  $df=9$ ,  $p<<0.001$ ). **B)** Colony 2 ( $F=3.29$ ,  $df=7$ ,  $p<0.01$ ).

169

170 Consistent with the hypothesis that brood nest temperature is important for the  
171 ontogeny of circadian rhythms, our results show that young workers kept at 35°C developed  
172 circadian rhythms as early as 2 days of age compared to young workers kept at 25°C, which  
173 began developing rhythms between 4-5 days of age (Figure 1). In addition, at 35°C between  
174 60-80% of workers developed circadian rhythms, while at 25°C less than 30% of the bees  
175 developed rhythmicity (Repeated measures MANOVA, colony 1:  $F=3.94$ ,  $df=9$ ,  $p<<0.001$ ;  
176 colony 2:  $F=3.29$ ,  $df=7$ ,  $p<0.01$ ) (Figure 1). This result indicates that colony temperature plays  
177 a key role in the development of circadian rhythmicity. Further examination of locomotor



178 activity plots of individuals that developed circadian rhythms revealed not only that the onset  
179 of circadian rhythmicity was different between groups, also that the endogenous period length  
180 in young workers was different between each experimental group (Figure 2).

181

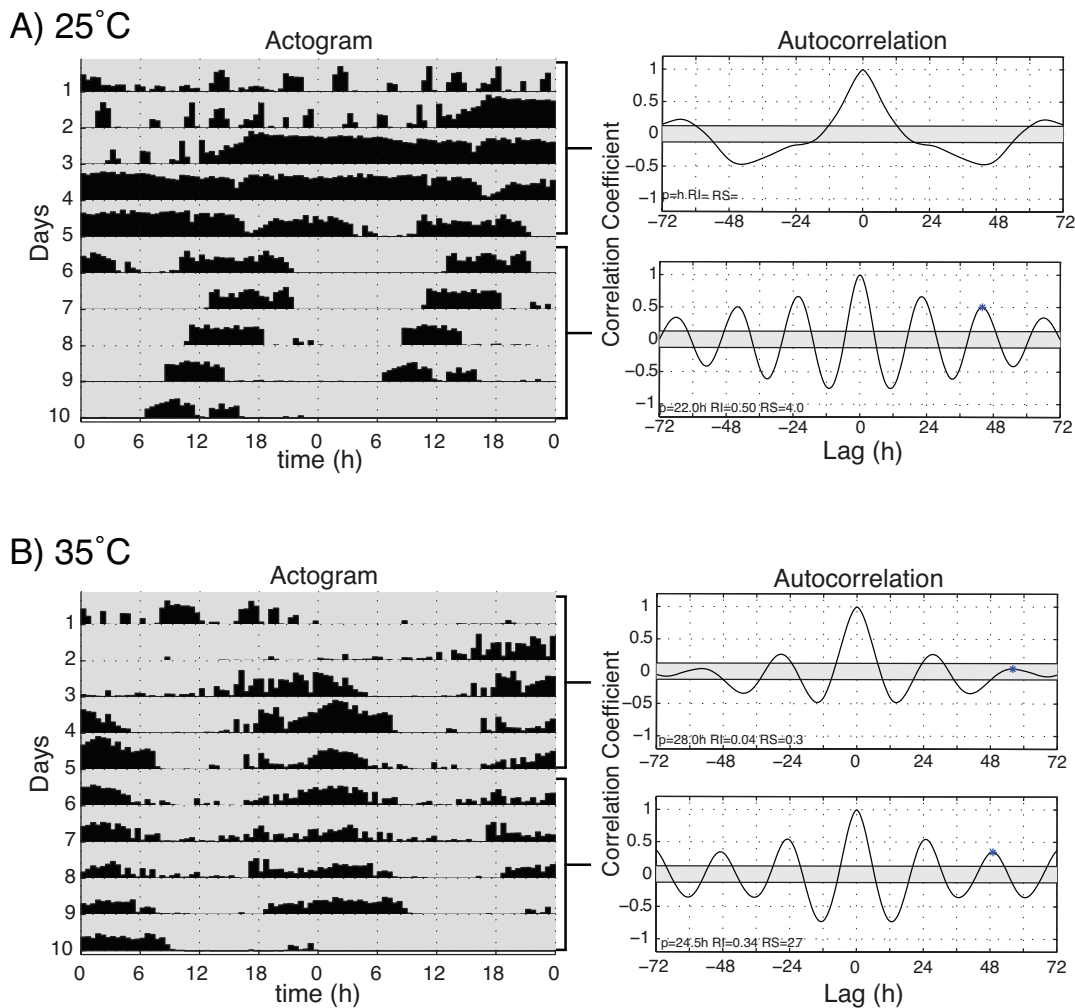

182

183 **Figure 2. Locomotor activity patterns of young honey bee workers under 25°C or 35°C constant**  
184 **darkness.** Double-plotted actograms of representative 1-day-old workers at **A) 25°C** and **B) 35°C**  
185 constant darkness. Autocorrelation plots were used to determine rhythmicity of locomotor activity and  
186 calculate the endogenous period length ( $p$ ), rhythm index ( $RI$ ) and rhythm strength ( $RS$ ), from days 1-  
187 5 and 6-10 for each individual.

188

189 Recent work on different species of honey bees has shown that environmental  
190 temperature affects endogenous period length of foragers (Fuchikawa and Isamu Shimizu,  
191 2007; Giannoni-Guzmán et al., 2014). We hypothesized that rhythmic young workers would  
192 present endogenous rhythms closer to 24 hours when assayed at 35°C than those assayed  
193 at 25°C. To test our hypothesis, we compared the endogenous periods of days 6-10 for  
194 rhythmic bees kept at 25°C or 35°C. The resulting analysis revealed that bees kept at 25°C  
195 have an average endogenous period length of 23.10hr, compared to that of bees kept at 35°C,  
196 whose average period was 24.5hr (Figure 3). This finding is consistent with previous work  
197 testing the endogenous period length in foragers (Giannoni-Guzmán et al., 2014; Moore and  
198 Rankin, 1985; Spangler, 1972; Toma et al., 2000).

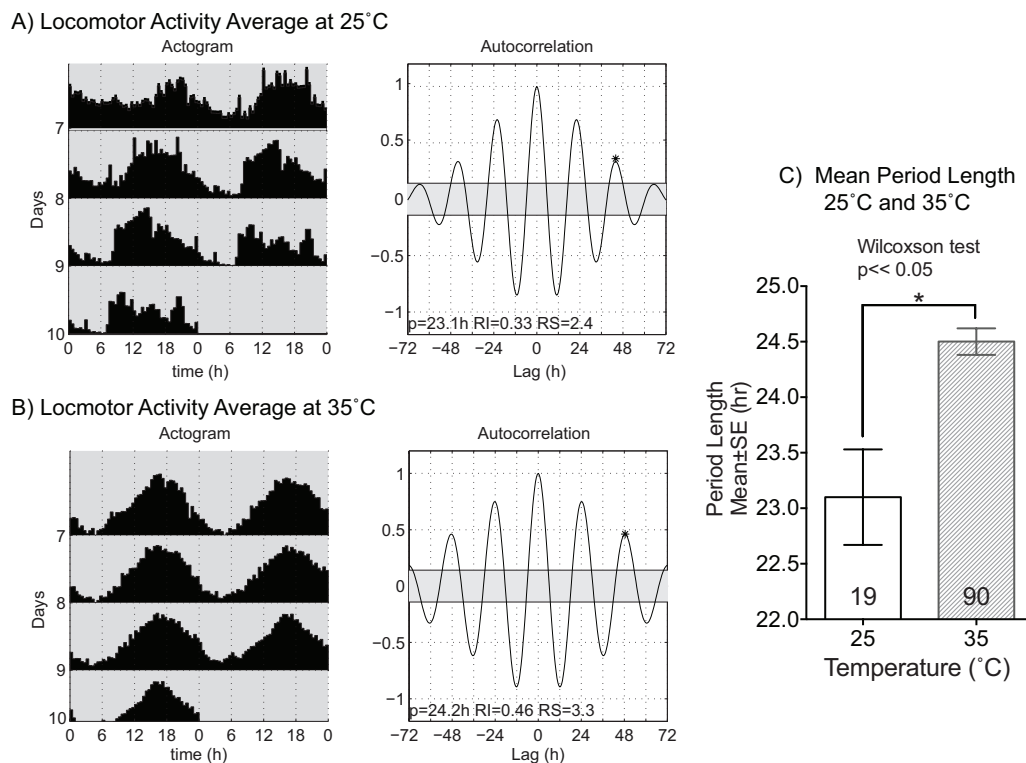

199

200 **Figure 3. Average endogenous period length of young bees at 35°C is closer to 24 hours.** Double-  
201 plotted actograms and autocorrelations of the average locomotor profile rhythmic bees at **A)** 25°C and  
202 **B)** 35°C for days 6-10. **C)** The mean period length at 35°C (24.5±0.13h SEM) was closer to 24 hours  
203 and significantly different from that measured in the 25°C cohort (23.10±0.29h SEM) (ANOVA  $F=18.59$ ,  
204  $df=1$ ,  $p < 0.01$ ).

205

206 Interestingly, we observed that the period length standard error of the 25°C group was  
207 higher than that of the 35°C group. By observing the distributions of period length for each of  
208 the group it was evident that the 25°C group presented a larger degree of variation than the  
209 35°C group (Figure 4A, B). To quantify this variation, we performed Levene's test of equality  
210 of variance, which confirmed that period length in the 25°C cohort varies significantly more  
211 than that of the 35°C cohort ( $F=17.9$ ,  $df=1$ ,  $p<<0.01$ ) (Figure 4C). Interestingly, this result does  
212 not translate to foragers, where the degree of variation in endogenous period length was not  
213 significantly different between foragers at 25°C or 35°C conditions (Levene's test,  $F=0.35$   
214  $df=1$ ,  $p=0.56$ ) (Figure 4C). Multiple comparisons between young workers and foragers at 25°C  
215 and 35°C, revealed that the degree of variation of foragers was similar to that of young workers  
216 at 35°C and significantly different from that of young bees at 25°C (Figure 4C). These results  
217 suggest that colony temperature after adult emergence plays an important role in the  
218 development of circadian circuitry in the honey bee system.

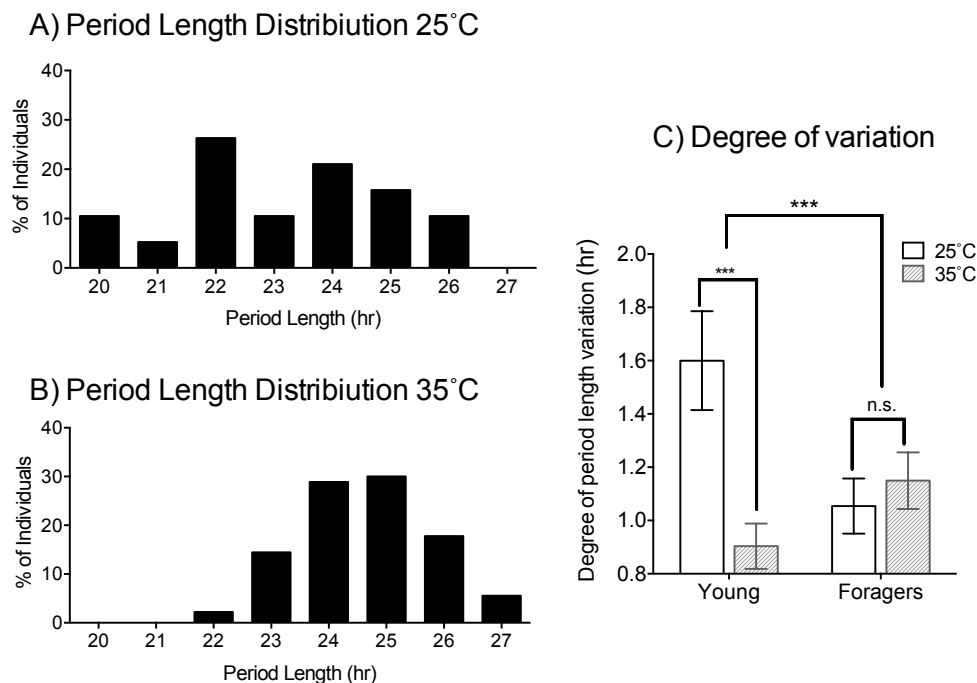

219 **Figure 4. Individual variation of endogenous period length is greater at 25°C than at 35°C**  
220 Frequency distributions of endogenous period length of days 6-10 from rhythmic young workers at **A)**  
221 25°C and **B)** 35°C. **C)** Bar graph comparing the degree of period length variation as calculated by  
222 Levene's test of equality of variance for young workers and foragers at 25°C (white bars) and 35°C  
223 (gray shaded bars). Significant differences were observed between the young worker cohorts ( $F=17.9$ ,  
224  $df=1$ ,  $p<<0.01$ ), while differences comparison within foragers was not significant ( $F=0.35$   $df=1$ ,  $p=0.56$ ).  
225 Multiple comparisons test revealed significant differences ( $p<0.05$ ) between young workers at 25°C and  
226 foragers at either 25°C or 35°C.

227 During the data analysis of the experiments, another difference that was noticed  
228 between the 25°C and 35°C cohorts was their mortality. When we compared the mortality of  
229 each group we observed that by day 10 only ~30% of bees in the 25°C cohort survived (Figure  
230 5A). Significantly, this was less than half of the mortality observed in the 35°C cohort, where  
231 more than ~65% of the bees were still alive (Gehan-Breslow-Wilcoxon test,  $p<<0.01$ ). This  
232 result is somewhat surprising since our experiments with foragers under the same  
233 experimental setup did not reveal significant differences in mortality (unpublished results).  
234 Furthermore, by separating each cohort by individuals who developed or did not develop  
235 circadian rhythms, we observed a relationship between arrhythmicity and mortality in both  
236 groups (Figure 5B). Nonparametric Kruskal-Wallis rank sums test revealed significant  
237 differences between arrhythmic and rhythmic individuals at 25° and at 35°C ( $F=78.13$ ,  $df=3$ ,  
238  $p<<0.01$ ). Post hoc analysis using Wilcoxon each pair test uncovered significant differences  
239 between 3 of the 4 groups tested, the exception being the comparison of rhythmic individuals  
240 at 25°C and arrhythmic individuals at 35°C. In order to ascertain potential factors playing a  
241 role in the mortality of honey bee workers, we used a proportional hazards model analysis.

242

243

244

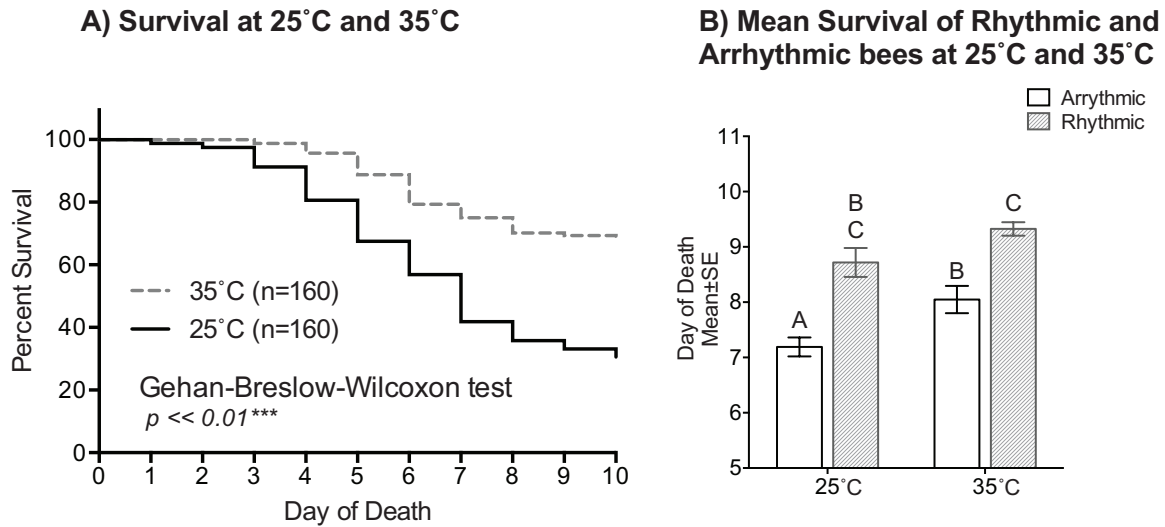

245

246 **Figure 5. Mortality of isolated young workers greatly increases at 25°C and in arrhythmic**  
247 **individuals.** A) Survival plot of 1-day-old honey bee cohorts at 25°C (solid line) and at 35°C (intermittent  
248 line). Both visual and statistical comparison of the cohorts revealed that survival of individuals was  
249 higher in the 35°C cohort (Gehan-Breslow-Wilcoxon,  $n=320$ ,  $p < 0.01$ ). B) Bar graph of mean survival  
250 and standard error of arrhythmic and rhythmic individuals separated by experimental cohort (25°C or  
251 35°C). Proportional Hazards model revealed that temperature and rhythmicity have independent effects  
252 on mortality in young workers (Temperature:  $X^2=12.35$ ,  $df=1$ ,  $p < 0.001$ ; Rhythm:  $X^2=15.64$ ,  $df=1$ ,  
253  $p < 0.001$ ; Temperature\*Rhythm:  $X^2=0.055$   $df=1$ ,  $p=0.8142$ ) Wilcoxon each Pair test revealed  
254 significant differences ( $p < 0.05$ ) between paired comparisons represented by different letters.

255

In this analysis environmental temperature, rhythmicity (whether the individual  
256 developed rhythms or was arrhythmic throughout the experiment) and the interaction of these  
257 factors were tested as the variables causing the observed mortality. The resulting analysis  
258 revealed that environmental temperature and rhythmicity, independently, have a significant  
259 effect on the mortality of young workers in our assay, while their interaction was not significant  
260 (Temperature:  $X^2=12.35$ ,  $df=1$ ,  $p < 0.001$ ; Rhythm:  $X^2=15.64$ ,  $df=1$ ,  $p < 0.001$ ;  
261 Temperature\*Rhythm:  $X^2=0.055$   $df=1$ ,  $p=0.8142$ ). The combined results suggest that in our  
262 experiments mortality is caused by the environmental temperature and the inability to develop  
263 a circadian rhythm independently and not their combination.

264

265 Our result that temperature positively influences the rate and proportion of individuals  
266 developing circadian rhythms combined with the findings from a recent study (Eban-  
267 Rothschild et al., 2012) that the first 48 hours in the colony influenced development of strong  
268 circadian rhythms led us to postulate the following prediction: If temperature is a key factor in  
269 the development of circadian rhythmicity during the first 48 hours after emergence in young  
270 workers, then placing 1-day old workers at 35°C for the first 48 hours after emergence and  
271 afterwards changing environmental temperature to 25°C, will result in a greater proportion of  
272 individuals developing circadian rhythms than 1 day-old workers placed at 25°C. To test this  
273 hypothesis, we placed 1-day old bees at either 35°C or 25°C group, after 48 hours, we  
274 changed the temperature to 25°C in the first group (35-25°C). Consistent with this prediction  
275 we found that exposure to 35°C during the first 48 hours after emergence plays a significant  
276 role in the development of circadian rhythms in young workers (Figure 6A). Repeated  
277 measures comparison of the cumulative distribution of rhythmic individuals for the 35-25°C  
278 group and bees continuously at the 25°C group, was significantly different ( $F=3.28$ ,  $df=6$ ,  
279  $p<0.01$ ). In addition to the effects of temperature on the development of circadian rhythm, we  
280 also observed significant differences in the survival of individuals exposed to 35°C for the first  
281 48 hours and those that were kept at 25°C. By day 7 less than 12 individuals had died in the  
282 35-25°C group, while more than 50 had died in the 25°C (Gehan-Breslow-Wilcoxon,  $n=256$ ,  
283  $p<<0.01$ ). Taken together, temperature in the colony plays a key role in the development of  
284 circadian rhythms of workers.

285

286

287

288

289

**A) Cumulative distribution of Rhythmic bees**

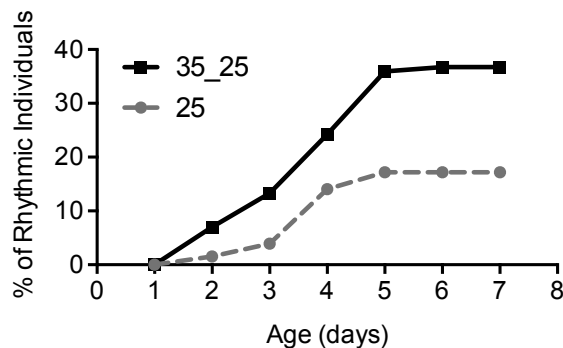

**B) Survival Analysis of bees at 35°C for the first 48hrs after emergence vs bees at 25°C**

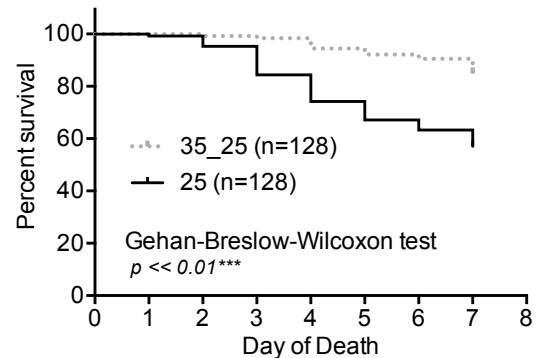

290

291 **Figure 6. Temperature (35°C) during the first 48 hours after emergence is sufficient to rescue**  
292 **the rhythmicity and mortality effects of 25°C. A)** Cumulative distribution of rhythmic young workers  
293 exposed to 35°C during the first 48 hours after emergence and afterwards placed at 25°C for the  
294 remainder of the experiment (35-25°C) compared to that of bees placed at 25°C after emergence.  
295 Repeated measures MANOVA revealed significant differences between the rate and proportion of  
296 individuals developing rhythmic behavior under these conditions ( $F=3.28$ ,  $df=6$ ,  $p<0.01$ ). **B)** Survival  
297 plot of 1-day-old honey bee cohorts at 25°C (solid line) and bees exposed to 35°C for the first 48 hours  
298 after emergence (intermittent line). Individuals in the 35-25°C cohort presented significantly better  
299 survival rates than bees placed at 25°C since the beginning of the experiment (Gehan-Breslow-  
300 Wilcoxon,  $n=256$ ,  $p<<0.01$ ).

301

302 **Discussion:**

303 In the current study, we show that colony temperature plays a key role in the ontogeny  
304 of circadian rhythms of young honey bee workers. Previous studies exploring the ontogeny of  
305 circadian rhythms of young workers established that circadian rhythms both in the field and in  
306 isolation commence around 7-9 days after eclosion (Bloch et al., 2001; Moore et al., 1998;  
307 Toma et al., 2000). Experiments that followed uncovered that exposure to the colony  
308 environment during the first 48 hours after eclosion significantly impacts the development of  
309 circadian rhythms under isolation (Eban-Rothschild et al., 2012). Here we show evidence  
310 indicating that the regulation of temperature (~35°C) in the colony is a key social factor

311 determining the development of circadian rhythms. Placing 1-day old workers at the hive's  
312 core temperature in the laboratory results in an accelerated rate and increased proportion of  
313 individuals developing rhythmicity (Figure 1). Moreover, we show that this temperature is  
314 particularly important during the first 48 hours after eclosion and kept exposure to 35°C in this  
315 period is sufficient for early rhythm development (Figure 6). Analysis of the endogenous period  
316 length variation of rhythmic bees, suggests that temperature may play a role in the  
317 development of the neural circuitry that regulate circadian rhythms (Figures 2,3,4). Lastly,  
318 mortality differences between experimental groups were associated with development of  
319 circadian rhythms. Taken together, socially regulated temperature plays a key role in the  
320 ontogeny of circadian rhythms in honey bee workers.

321         The proportion and rate of honey bee workers developing circadian rhythms in the  
322 35°C cohort is consistent with work examining the effect of colony environment on circadian  
323 rhythms, where after 48 hours of colony exposure between 60-80% of bees presented  
324 circadian rhythms (Eban-Rothschild et al., 2012). In addition, individuals exposed to 35°C for  
325 the first 48 hours after eclosion presented twice the proportion (40%) of rhythmic bees than  
326 bees that at 25°C (20%). This suggests that temperature is one of several factors that play a  
327 role in the development of circadian rhythmicity. Furthermore, our results in the 25°C groups  
328 are very similar to those of bees that only spent the the first 24 hours after eclosion inside the  
329 colony (Eban-Rothschild et al., 2012). Further studies are needed to ascertain the relative  
330 importance of temperature on the ontogeny of circadian rhythmicity compared to other colony  
331 factors. Studying the neural changes that may occur during the critical period of 24-48 hours  
332 after emergence in the honey bee nervous system, may provide clues as to the other factors  
333 that influence development of circadian rhythms.

334         In our data and that of previous studies examining the ontogeny of circadian rhythms  
335 in workers, we can observe that not all individuals develop circadian rhythms by the end of



336 the experiment (Eban-Rothschild et al., 2012; Meshi and Bloch, 2007; Toma et al., 2000).  
337 While the percent of arrhythmic individuals at 35°C is similar to that of previous studies at the  
338 end of the experiment, at 25°C the percent of arrhythmic individuals more than double of that  
339 in previous studies (Figure 1). One possible factor that is influencing this result is the time of  
340 the year the experiments were carried out, which was winter in Puerto Rico. During winter  
341 there are drastic changes in the colony demography and dynamics, such as reduction of brood  
342 and complete cease of foraging behavior (Doke et al., 2015). These changes have been  
343 mostly studied in temperate zones, where the seasons are marked by drastic changes in  
344 weather and may not be necessarily applicable to Puerto Rico. Based on our current data set,  
345 further experiments are required to accept or discard the effect of season in the ontogeny of  
346 circadian rhythmicity.

347         Our results and those of other studies provide strong evidence that temperature plays  
348 a key role in the ontogeny of circadian rhythms in young workers. However, other studies in  
349 the field and laboratory provide evidence that other factors influence the development of  
350 circadian rhythmicity, such as genetic background and social environment. Monitoring the  
351 behavior of individual bees in the colony as they aged, researchers have shown that  
352 rhythmicity, measured using standing behavior as the measure of inactivity in the colony,  
353 found that bees of fast genotypes, which show accelerated behavioral development into  
354 foragers (Giray and Robinson, 1994), present circadian rhythms as early as 4-7 days of age  
355 in some cases, while the slow genotype bees did not show rhythms until the 16-19-day interval  
356 (Moore et al., 1998). This finding is consistent with the onset of foraging in slow and fast  
357 genotype groups (Giray et al., 1999). The authors of this study conclude that bees inside the  
358 hive present rhythmic activity much earlier than onset of foraging. While in the current study  
359 we did not control the genetic background of our bees, we did examine two different colonies  
360 and obtained similar results.

361           Since our experiments were performed in the laboratory and individuals were isolated,  
362 we cannot measure in the current data set the effects of pheromone on the development of  
363 circadian rhythms. However, studies have shown that exposure to the foragers advances  
364 development of circadian rhythmicity, while bees housed with young bees of their same age  
365 cohort develop rhythmicity later (Meshi and Bloch, 2007). Furthermore, young workers that  
366 had direct contact with the brood did not show circadian rhythms even when outside the hive  
367 and under light/dark cycles (Shemesh et al., 2007, 2010). Taken together, ontogeny of  
368 circadian rhythms in the honey bee colony context is regulated by the socially regulated  
369 factors of temperature, social interactions with brood, foragers and young workers, and  
370 potentially genetic background.

371           Endogenous period length of young bees at 35°C ( $24.5 \pm 0.12$  hr SE) was on average  
372 closer to the Earth's rotational period than that of individuals at 25°C ( $23.1 \pm 0.43$  hr SE) (Figure  
373 2 and Figure 3). This result is consistent with our previous work on honey bees and work on  
374 *Apis cerana* where environmental temperature influenced endogenous period length,  
375 suggesting that the circadian clock of young workers is able to compensate for environmental  
376 temperature changes (Fuchikawa and Shimizu, 2007; Giannoni-Guzmán et al., 2014). While  
377 differences between 25°C and 35°C cohorts in average period length was consistent with that  
378 of foragers, the degree of period length variation was different between young workers at 25°C  
379 and 35°C, while the degree of variation in foragers at both 25°C and 35°C was similar to that  
380 of young workers at 35°C (Figure 4). Since foraging is the last job a worker performs before  
381 dying, these similarities in period length variation between young workers kept at 35°C and  
382 foragers at both temperatures is most likely related to foragers having spent the majority of  
383 their life inside the colony. The foragers in this study were captured at the entrance of the  
384 colony, so we can assume that they had fully developed circadian rhythms. This result  
385 suggests that bees exposed to 25°C from a young age may have differences in the

386 development of the circadian network or present a lack of communication between different  
387 clocks in the honey bee circadian system.

388         With regard to the survival rates observed in bees at 35°C and those at 25°C (Figure  
389 5), our analysis indicates that environmental temperature and lack of rhythmicity are  
390 independently decreasing survival rates. The effect of temperature on mortality is consistent  
391 with our data that temperature is important for the development of circadian rhythmicity and  
392 that changes in temperature during development can have long lasting effects later in the  
393 honey bee's life (Becher et al., 2009; Jones et al., 2004; Tautz et al., 2003). It is possible that  
394 in addition to development of circadian rhythms, other systems are still under development  
395 and do not develop properly at 25°C causing the observed mortality.

396         Comparing the development of circadian rhythms of honey bee workers with that of  
397 other insects suggests that the postembryonic ontogeny in honey bees may be a product of  
398 the colony's social context. Studies examining the circadian rhythms of various insects show  
399 rhythmic activity at even pre-adult stages (Fantinou et al., 1998; Kaneko and Hall, 2000; Page  
400 and Block, 1980; Tomioka and Chiba, 1982). In the case of crickets and cockroaches,  
401 circadian rhythmicity has been documented in pre-adult nymph stages and its patterns change  
402 as individuals age (Page and Block, 1980; Tomioka and Chiba, 1982). In other insects such  
403 as egg-parasitic wasp *Telenomus busseolae*, adult emergence is timed by their entrainment  
404 of light/dark cycles, providing evidence of early development of the circadian system (Fantinou  
405 et al., 1998). In contrast to honey bee brood which is kept at almost constant conditions, in  
406 these insects the pre-adults (eggs, larvae, pupae, nymphs) are at the mercy of the external  
407 environment and having a working circadian system becomes necessary for their survival. In  
408 the case of honey bees, since conditions are constant during development, the ability to  
409 predict changes in the environment during larval and pupal development becomes less  
410 necessary, thus it is possible that honey bee circadian rhythms have evolved to developed

411 after adult emergence when they are needed. For example, in marsupials, such as kangaroos,  
412 where gestation is short and many developmental processes occur after birth, the front limbs  
413 are much more developed than other systems because upon birth they are required in order  
414 to climb to the maternal pouch and to the mother's nipple to feed (Wittmann, 1981, 1984). At  
415 what exact stage of development and what processes are driving the ontogeny of circadian  
416 rhythms in honey bee workers is a subject of further research.

417 In order to present circadian rhythms of locomotion, the connectivity between various  
418 systems is necessary. At the brain level, it is known that multiple oscillators that control the  
419 timing of locomotor activity, at different times of the day (e.g. morning and evening cells), not  
420 only need to communicate but they need to be synchronized in a specific manner (Stoleru et al.,  
421 2004, 2005). One of the possible processes that may be occurring in the first 48 hours after  
422 emergence in workers is the establishment of connections between the multiple oscillators in  
423 the honey bee brain. Another circuit that is necessary for locomotor rhythms is the connectivity  
424 between motor neurons and the different oscillators in the brain (Blanchardon et al., 2001).  
425 Motor neurons are organized forming central pattern generators that coordinate the  
426 movement of extremities independently of the brain. However, without a signal from the brain,  
427 the initiation and regulation of locomotor rhythms is not possible (Allada et al., 1998). If the  
428 formation of this connection is regulated by temperature in honey bees and is occurring in this  
429 48-hour window after emergence, then arrhythmicity may be explained by the failure to  
430 establish this connection.

431 An additional process that is important in the regulation of circadian locomotion is the  
432 connections between motor neurons and muscles (i.e. Neuromuscular junction (NMJ)). This  
433 connectivity has been studied extensively in multiple insects, and the cellular and molecular  
434 processes have been well characterized in *Drosophila* (H Keshishian et al., 2003).  
435 Experiments exploring the effects of temperature on these connections show a temperature

436 dependent plasticity of motor nerve terminal arborization, where at higher temperatures more  
437 arborization of the nerve terminal occurs (Zhong, 2004). In honey bees, measuring circadian  
438 gene expression in the brain and muscle of young arrhythmic workers indicates that the  
439 muscle clock oscillates, while the brain's clock did not seem to oscillate (Ben Attia, 2014).  
440 Based on what is known in other models and this finding it is possible that different oscillators  
441 in the brain have not synchronized with each other and that the connection between the brain's  
442 oscillators and peripheral oscillators, at the time of collection, has not been established and  
443 requires further research.

444 In conclusion, this study shows for the first time the effects of colony temperature on  
445 the ontogeny of circadian rhythms, specifically during the first two days after adult emergence.  
446 Future studies will examine the weight of temperature as a factor in the development of  
447 circadian rhythms and examine the weight of other factors, such as genetic background and  
448 social cues. In addition, carefully examining the changes at the neural and gene expression  
449 levels occurring during the first 48 hours may provide insight into the mechanisms driving the  
450 ontogeny of circadian rhythms in honey bee workers, which remain to be elucidated.

#### 451 **Acknowledgements:**

452 We would like to thank Dr. Arian Avalos and Emmanuel Rivera, for help with the  
453 experiments. Thanks Dr. Luis de Jesus for their comments and suggestions. We would also  
454 like to recognize the director, Manuel Diaz and the personnel of the Gurabo Experimental  
455 Agriculture Station of the University of Puerto Rico at Mayaguez for use of facilities at "Casa  
456 Amarilla". This work was sponsored by the National Science Foundation (NSF) awards  
457 1026560, 1633184, 1707355 and the National Institute of Health (NIH) 2R25GM061151-13,  
458 P20GM103475 .

459

460 **References:**

461 Allada R; NE White; W V So; JC Hall and M Rosbash (1998) A mutant *Drosophila* homolog  
462 of mammalian Clock disrupts circadian rhythms and transcription of period and  
463 timeless. *Cell* 93(5): 791–804. Available from:  
464 <http://www.ncbi.nlm.nih.gov/pubmed/9630223>.

465 Becher MA; H Scharpenberg and RF Moritz (2009) Pupal developmental temperature and  
466 behavioral specialization of honeybee workers (*Apis mellifera* L.). *Journal of*  
467 *comparative physiology. A, Neuroethology, sensory, neural, and behavioral physiology*  
468 195(7): 673–679. Available from: <http://www.ncbi.nlm.nih.gov/pubmed/19390855>.

469 Ben-Shahar Y (2003) cGMP-dependent changes in phototaxis: a possible role for the  
470 foraging gene in honey bee division of labor. *Journal of Experimental Biology* 206(14):  
471 2507–2515. Available from: <http://jeb.biologists.org/cgi/doi/10.1242/jeb.00442>  
472 (accessed 1 November 2014).

473 Blanchardon E; B Grima; A Klarsfeld; E Chelot; PE Hardin; T Preat and F Rouyer (2001)  
474 Defining the role of *Drosophila* lateral neurons in the control of circadian rhythms in  
475 motor activity and eclosion by targeted genetic ablation and PERIOD protein  
476 overexpression. *European Journal of Neuroscience* 13(5): 871–888. Available from:  
477 <http://doi.wiley.com/10.1046/j.0953-816x.2000.01450.x> (accessed 23 May 2016).

478 Bloch G; DP Toma and GE Robinson (2001) Behavioral Rhythmicity, Age, Division of Labor  
479 and period Expression in the Honey Bee Brain. *Journal of biological rhythms* 16(5):  
480 444–456.

481 Bloch G; JP Sullivan and GE Robinson (2002) Juvenile hormone and circadian locomotor  
482 activity in the honey bee *Apis mellifera*. *Journal of insect physiology* 48: 1123–1131.

483 Doke MA; M Frazier and CM Grozinger (2015) Overwintering honey bees: biology and

- 484 management. *Current Opinion in Insect Science* 10: 185–193. Available from:  
485 <http://www.sciencedirect.com/science/article/pii/S2214574515000930> (accessed 16  
486 June 2015).
- 487 Eban-Rothschild A; Y Shemesh and G Bloch (2012) The colony environment, but not direct  
488 contact with conspecifics, influences the development of circadian rhythms in honey  
489 bees. 2012/06/02 ed. *Journal of biological rhythms* 27(3): 217–225. Available from:  
490 <http://www.ncbi.nlm.nih.gov/pubmed/22653890>.
- 491 Fantinou AA; MP Alexandri and JA Tsitsipis (1998) Adult emergence rhythm of the egg-  
492 parasitoid *Telenomus busseolae*. *Biocontrol* 43(2): 141–151.
- 493 Fuchikawa T and I Shimizu (2007) Circadian rhythm of locomotor activity in the Japanese  
494 honeybee, *Apis cerana japonica*. *Physiological Entomology* 32(1): 73–80.
- 495 Fuchikawa T and I Shimizu (2007) Effects of temperature on circadian rhythm in the  
496 Japanese honeybee, *Apis cerana japonica*. *Journal of insect physiology* 53(11): 1179–  
497 1187. Available from: <http://www.ncbi.nlm.nih.gov/pubmed/17655856> (accessed 20  
498 April 2014).
- 499 Giannoni-Guzmán MA; A Avalos; J Marrero Perez; EJ Otero Loperena; M Kayım; JA  
500 Medina; SE Massey; M Kence; A Kence; T Giray and JL Agosto-Rivera (2014)  
501 Measuring individual locomotor rhythms in honey bees, paper wasps and other similar-  
502 sized insects. *The Journal of experimental biology* 217(Pt 8): 1307–15. Available from:  
503 <http://www.ncbi.nlm.nih.gov/pubmed/24436380> (accessed 30 July 2014).
- 504 Giray T and GE Robinson (1994) Effects of intracolony variability in behavioral development  
505 on plasticity of division of labor in honey bee colonies. *Behavioral Ecology and*  
506 *Sociobiology* 35(1): 13–20. Available from:  
507 <http://link.springer.com/10.1007/BF00167054> (accessed 25 September 2014).

- 508 Giray T; E Guzman-Novoa; CW Aron; B Zelinsky; SE Fahrbach and GE Robinson (1999)  
509 Genetic variation in worker temporal polyethism and colony defensiveness in the honey  
510 bee, *Apis mellifera*. *Behavioral Ecology* 11(1): 44–55. Available from: <Go to  
511 ISI>://WOS:000088355900007.
- 512 Goodwin RM and D Lewis (1987) Honeybees use a biological clock to incorporate sun  
513 positions in their waggle dances after foraging under heavy overcast skies. *New Zealand*  
514 *Entomologist* 10: 138–140.
- 515 H Keshishian; K Broadie; and A Chiba and M Bate (2003) The *Drosophila* Neuromuscular  
516 Junction: A Model System for Studying Synaptic Development and Function. Annual  
517 Reviews 4139 El Camino Way, P.O. Box 10139, Palo Alto, CA 94303-0139, USA.  
518 Available from:  
519 [http://www.annualreviews.org/doi/abs/10.1146/annurev.ne.19.030196.002553?journalC](http://www.annualreviews.org/doi/abs/10.1146/annurev.ne.19.030196.002553?journalCode=neuro)  
520 [ode=neuro](http://www.annualreviews.org/doi/abs/10.1146/annurev.ne.19.030196.002553?journalCode=neuro) (accessed 23 May 2016).
- 521 Human H; SW Nicolson and V Dietemann (2006) Do honeybees, *Apis mellifera scutellata*,  
522 regulate humidity in their nest? *Die Naturwissenschaften* 93(8): 397–401. Available  
523 from: <http://www.ncbi.nlm.nih.gov/pubmed/16670906> (accessed 29 February 2016).
- 524 Jones JC; MR Myerscough; S Graham and BP Oldroyd (2004) Honey bee nest  
525 thermoregulation: diversity promotes stability. *Science* 305(5682): 402–404. Available  
526 from: <http://www.ncbi.nlm.nih.gov/pubmed/15218093>.
- 527 Jones JC; P Nanork and BP Oldroyd (2007) The role of genetic diversity in nest cooling in a  
528 wild honey bee, *Apis florea*. *Journal of comparative physiology. A, Neuroethology,*  
529 *sensory, neural, and behavioral physiology* 193(2): 159–65. Available from:  
530 <http://www.ncbi.nlm.nih.gov/pubmed/17013621> (accessed 27 January 2014).
- 531 Kaneko M and JC Hall (2000) Neuroanatomy of cells expressing clock genes in *Drosophila*:



532 Transgenic manipulation of the period and timeless genes to mark the perikarya of  
533 circadian pacemaker neurons and their projections. *Journal of Comparative Neurology*  
534 422(1): 66–94.

535 Kronenberg F and HC Heller (1982) Colonial thermoregulation in honey bees (*Apis*  
536 *mellifera*). *Journal of Comparative Physiology ? B* 148(1): 65–76. Available from:  
537 <http://link.springer.com/10.1007/BF00688889> (accessed 18 April 2014).

538 Levine JD; P Funes; HB Dowse and JC Hall (2002) Signal analysis of behavioral and  
539 molecular cycles. *BMC neuroscience* 3: 1. Available from:  
540 [http://www.pubmedcentral.nih.gov/articlerender.fcgi?artid=65508&tool=pmcentrez&ren](http://www.pubmedcentral.nih.gov/articlerender.fcgi?artid=65508&tool=pmcentrez&rendertype=abstract)  
541 [dertype=abstract](http://www.pubmedcentral.nih.gov/articlerender.fcgi?artid=65508&tool=pmcentrez&rendertype=abstract).

542 Meshi A and G Bloch (2007) Monitoring circadian rhythms of individual honey bees in a  
543 social environment reveals social influences on postembryonic ontogeny of activity  
544 rhythms. *Journal of biological rhythms* 22(4): 343–355. Available from:  
545 <http://www.ncbi.nlm.nih.gov/pubmed/17660451>.

546 Moore D (2001) Honey bee circadian clocks: behavioral control from individual workers to  
547 whole-colony rhythms. *Journal of insect physiology* 47: 843–857.

548 Moore D and MA Rankin (1985) Circadian locomotor rhythms in individual honey bees.  
549 *Physiological Entomology* 10: 191–197.

550 Moore D; JE Angel; IM Cheeseman; SE Fahrbach and GE Robinson (1998) Timekeeping in  
551 the honey bee colony: integration of circadian rhythms and division of labor. *Behav*  
552 *Ecol Sociobiol* 43: 147–160.

553 Ohashi M; H Ikeno; T Kimura; T Akamatsu; R Okada and E Ito (2008) Control of hive  
554 environment by honeybee (*Apis mellifera*) in Japan. *Proceeding(1961)*: 2008.

555 Page TL and GD Block (1980) Circadian rhythmicity in cockroaches: Effects of early post-

- 556 embryonic development and aging. *Physiological Entomology* 5(3): 271–281.
- 557 SAS Institute Inc. (2009) *JMP® 8 User Guide*. Second Edi. Cary, NC: SAS.
- 558 Seeley TD (1974) Atmospheric carbon dioxide regulation in honey-bee (*Apis mellifera*)  
559 colonies. *Journal of Insect Physiology* 20(11): 2301–2305. Available from:  
560 <http://www.sciencedirect.com/science/article/pii/0022191074900523> (accessed 17  
561 March 2016).
- 562 Shemesh Y; M Cohen and G Bloch (2007) Natural plasticity in circadian rhythms is mediated  
563 by reorganization in the molecular clockwork in honeybees. 2007/03/16 ed. *FASEB*  
564 21(10): 2304–2311. Available from: <http://www.ncbi.nlm.nih.gov/pubmed/17360847>.
- 565 Shemesh Y; A Eban-Rothschild; M Cohen and G Bloch (2010) Molecular dynamics and  
566 social regulation of context-dependent plasticity in the circadian clockwork of the honey  
567 bee. 2010/09/17 ed. *The Journal of neuroscience : the official journal of the Society for*  
568 *Neuroscience* 30(37): 12517–12525. Available from:  
569 <http://www.ncbi.nlm.nih.gov/pubmed/20844146> (accessed 1 April 2014).
- 570 Simpson J (1961) Nest Climate Regulation in Honey Bee Colonie: Honey bees control their  
571 domestic environment by methods based on their habit of clustering together. *Science*  
572 (*New York, N. Y.*) 133(3461): 1327–33. Available from:  
573 <http://www.ncbi.nlm.nih.gov/pubmed/17744947> (accessed 17 March 2016).
- 574 Spangler HG (1972) Daily Activity Rhythms of Individual Worker and Drone Honey Bees.  
575 *Annals of the Entomological Society of America* 65(5): 1073–1076.
- 576 Stoleru D; Y Peng; JL Agosto-Rivera and M Rosbash (2004) Coupled oscillators control  
577 morning and evening locomotor behaviour of *Drosophila*. 2004/10/16 ed. *Nature*  
578 431(7010): 862–868. Available from: <http://www.ncbi.nlm.nih.gov/pubmed/15483615>.
- 579 Stoleru D; Y Peng; P Nawathean and M Rosbash (2005) A resetting signal between

580 *Drosophila* pacemakers synchronizes morning and evening activity. 2005/11/11 ed.

581 *Nature* 438(7065): 238–242. Available from:

582 <http://www.ncbi.nlm.nih.gov/pubmed/16281038>.

583 Tautz J; S Maier; C Groh; W Rossler and A Brockmann (2003) Behavioral performance in

584 adult honey bees is influenced by the temperature experienced during their pupal

585 development. *Proceedings of the National Academy of Sciences of the United States of*

586 *America* 100(12): 7343–7347. Available from:

587 <http://www.ncbi.nlm.nih.gov/pubmed/12764227>.

588 Toma DP; G Bloch; D Moore and GE Robinson (2000) Changes in period mRNA levels in

589 the brain and division of labor in honey bee colonies. *Proceedings of the National*

590 *Academy of Sciences of the United States of America* 97(12): 6914–6919.

591 Tomioka K and Y Chiba (1982) Post-embryonic development of circadian rhythm in the

592 cricket, *Gryllus bimaculatus*: A rhythm reversal. *Journal of Comparative Physiology ???*

593 *A* 147(3): 299–304.

594 Van Nest BN and D Moore (2012) Energetically optimal foraging strategy is emergent

595 property of time-keeping behavior in honey bees. *Behavioral Ecology* 23(3): 649–658.

596 Available from: <http://www.beheco.oxfordjournals.org/cgi/doi/10.1093/beheco/ars010>

597 (accessed 26 May 2014).

598 von Frisch K (1967) *The Dance Language and Orientation of Bees*. Cambridge, MA.:

599 Harvard University Press.

600 Wagner AE; BN Van Nest; CN Hobbs and D Moore (2013) Persistence, reticence and the

601 management of multiple time memories by forager honey bees. *The Journal of*

602 *experimental biology* 216(Pt 7): 1131–1141. Available from:

603 <http://www.ncbi.nlm.nih.gov/pubmed/23197093>.

- 604 Winston ML (1987) *The biology of the honey bee*. Cambridge, MA: Harvard University  
605 Press.
- 606 Wittmann KJ (1981) Comparative biology and morphology of marsupial development in  
607 Leptomysis and other Mediterranean Mysidacea (Crustacea). *Journal of experimental*  
608 *marine Biology and Ecology*, Elsevier 52(2): 243–270.
- 609 Wittmann KJ (1984) Ecophysiology of marsupial development and reproduction in  
610 Mysidacea (Crustacea). *Oceanogr Mar Biol Annu Rev* 22: 393–428.
- 611 Zhong Y (2004) Neuronal Activity and Adenylyl Cyclase in Environment-Dependent  
612 Plasticity of Axonal Outgrowth in *Drosophila*. *Journal of Neuroscience* 24(6): 1439–  
613 1445. Available from: [http://www.jneurosci.org/cgi/doi/10.1523/JNEUROSCI.0740-](http://www.jneurosci.org/cgi/doi/10.1523/JNEUROSCI.0740-02.2004)  
614 [02.2004](http://www.jneurosci.org/cgi/doi/10.1523/JNEUROSCI.0740-02.2004).
- 615
- 616
